# Supplementary figures and images for: What Makes a Successful Donor? Fecal Transplant from Anxious-Like Rats Does Not Prevent Spinal Cord Injury-Induced Dysbiosis
Source: MDPI journal article supplement (doi:10.3390/biology10040254), 2021-03-24

● SCI  
□ SCI+FMT

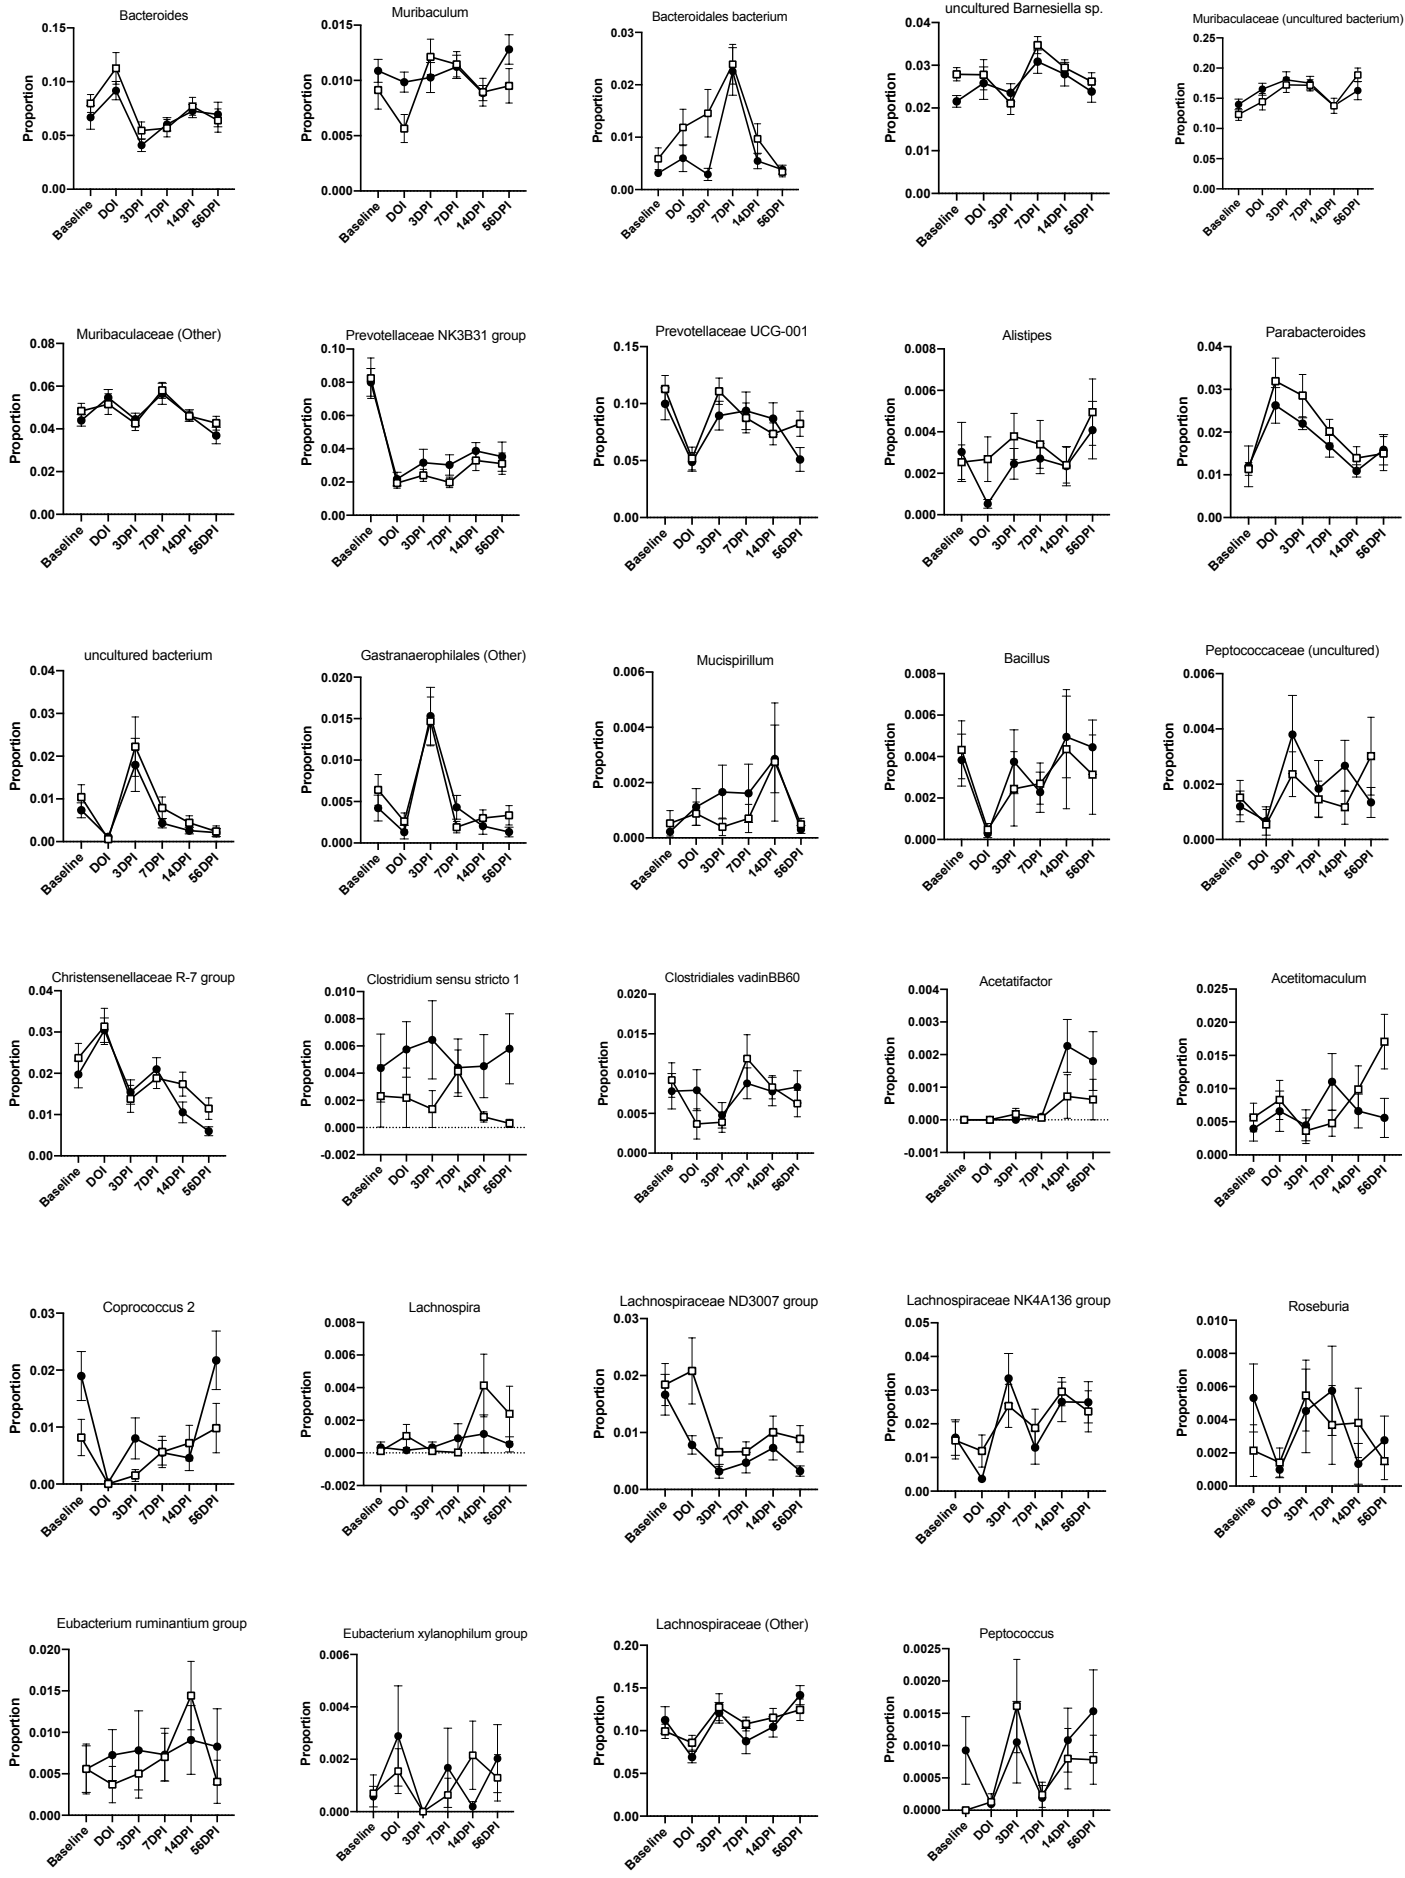

Supplement: s1 [file s1]

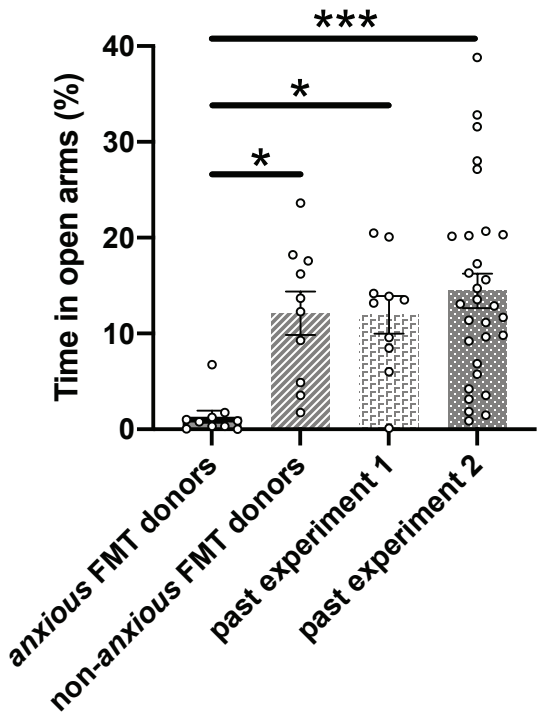

Supplement: s1 [file s1]

● SCI  
 □ SCI+FMT

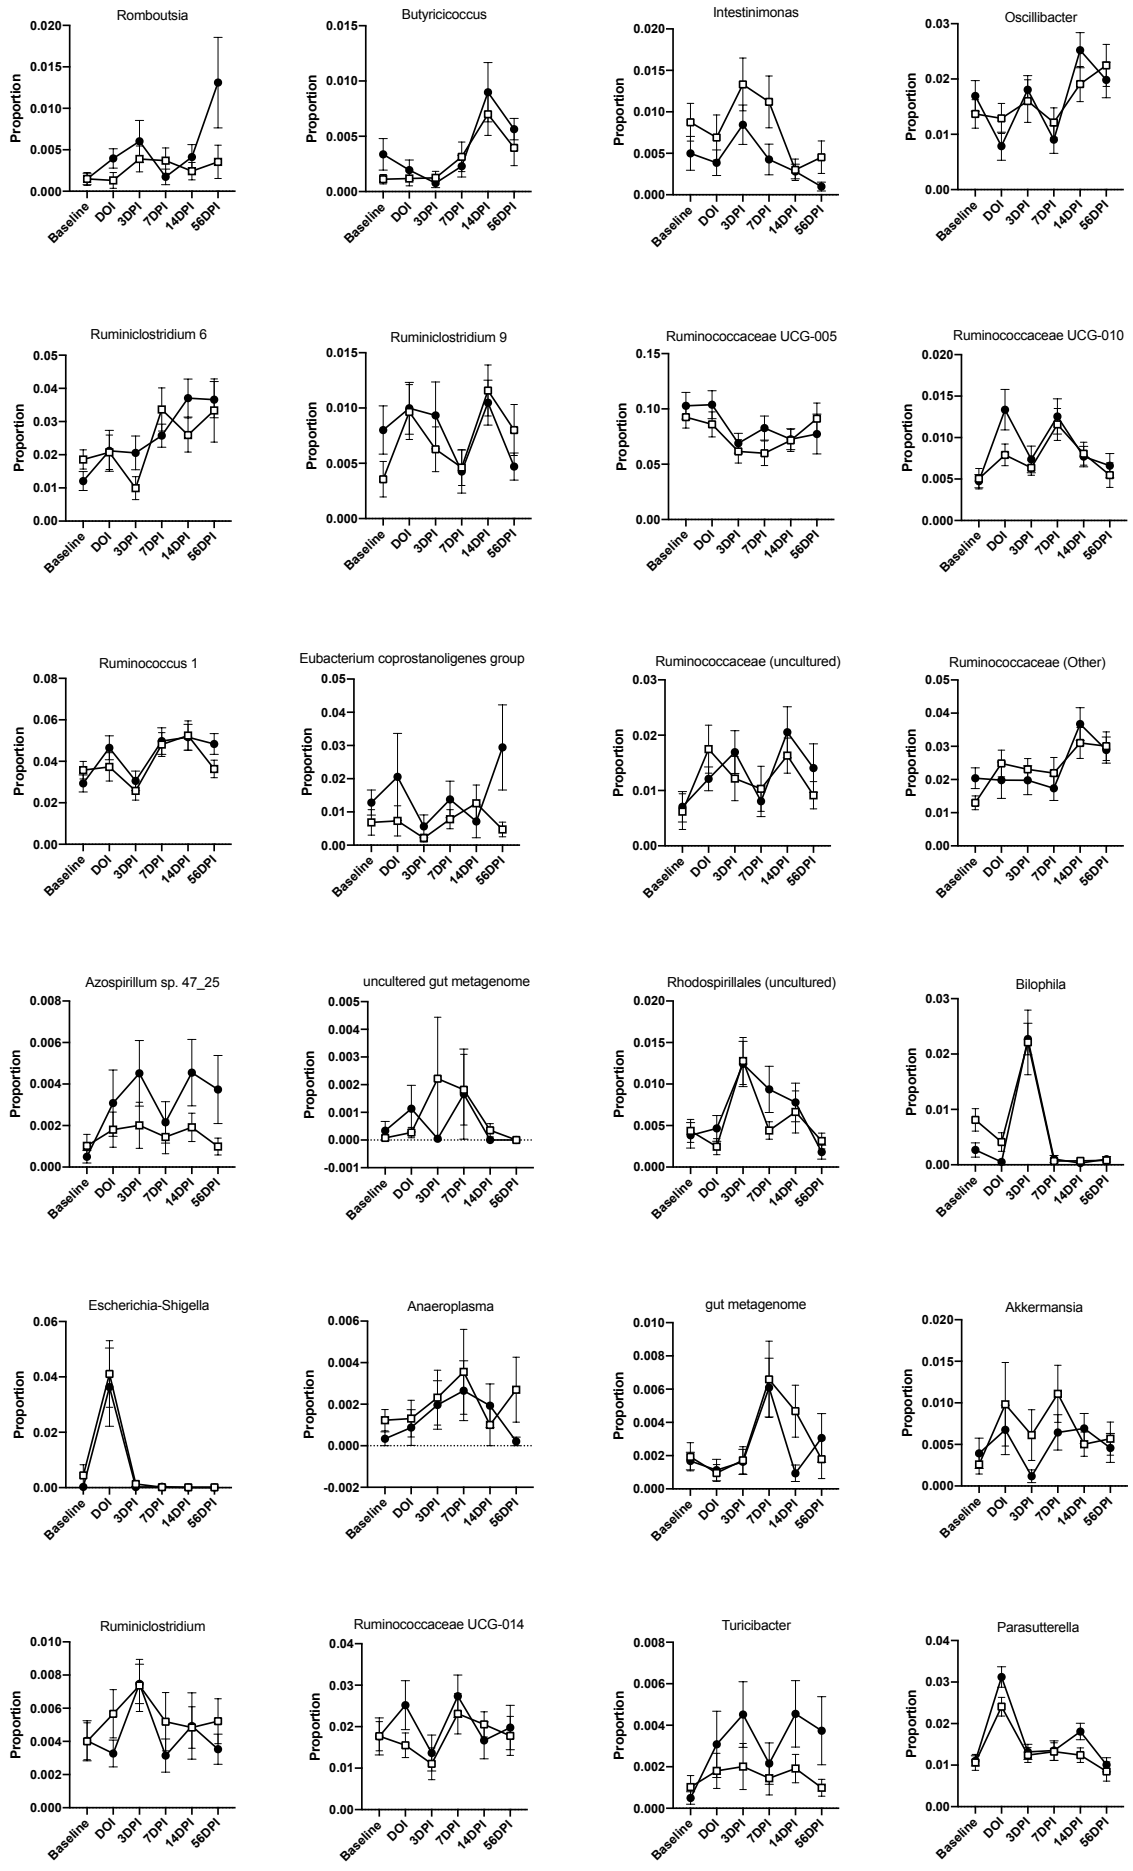

Supplement: s1 [file s1]
